# Supplementary material for: Only SETBP1 hotspot mutations are associated with refractory disease in myeloid malignancies
Source: Springer Nature journal article supplement (doi:10.1007/s00432-017-2518-z), 2017-09-14
Supplement: MOESM3 [file 15058880]

**Supplementary Table 3** *Comparison of single and sequential time point sub cohort in main clinical parameters.*Except for a statistical significant difference in gender, the characteristics of both sub cohorts were evenly balanced.

| **Variable** | **Status** | **Total (%)** | **Single time point analysis (%)** | **Sequential analysis (%)** | **Odds ratio** | **P-value** |
| --- | --- | --- | --- | --- | --- | --- |
| Screened cases |  | 442 (100) | 319 (72) | 123 (28) |  |  |
| Gender | Female | 193 (44) | 129(40) | 64(53) |  |  |
|  | Male | 249 (56) | 190(60) | 59(48) | **1.6** | **0.018** |
| Median age |  | 64 | 65 | 63 |  |  |
| Disease | MPN | 111(25) | 86(27) | 25(20) |  |  |
|  | MDS/MPN | 43(10) | 30(9) | 13(11) |  |  |
|  | MDS | 98(22) | 67(21) | 31(25) |  |  |
|  | *de novo* AML | 61(14) | 43(14) | 18(15) |  |  |
|  | sAML | 117(26) | 83(26) | 34(27) |  |  |
|  | aplastic anemia | 12(3) | 10(3) | 2(2) | 3.3(chi square test) | 0.6 |
| Leukocyte count | <10,000/µl | 254(57) | 180(57) | 74(60) |  |  |
|  | >10,000/µl | 184(42) | 135(43) | 49(40) | 0.9 | 0.3 |
| Hematocrit | >25% | 377(85) | 268(85) | 109(89) |  |  |
|  | <25% | 61(14) | 47(15) | 14(11) | 0.7 | 0.2 |
| Platelet count | >80,000/µl | 225(51) | 159(50) | 66(54) |  |  |
|  | <80,000/µl | 213(48) | 156(50) | 57(46) | 0.9 | 0.3 |
